## Patterning of proneuronal and inter-proneuronal domains by *hairy*- and *enhancer of split*-related genes in zebrafish neuroectoderm

Young-Ki Bae, Takashi Shimizu and Masahiko Hibi *Development* **132**, 1375-1385.

In Fig. 3 of this paper, panel C and panel K were inadvertently duplicated. Panel C has been replaced with the correct panel in the figure reprinted below. There are no changes to the figure legend, which is accurate. This error does not affect the conclusions of the study.

The authors apologise to readers for this mistake.

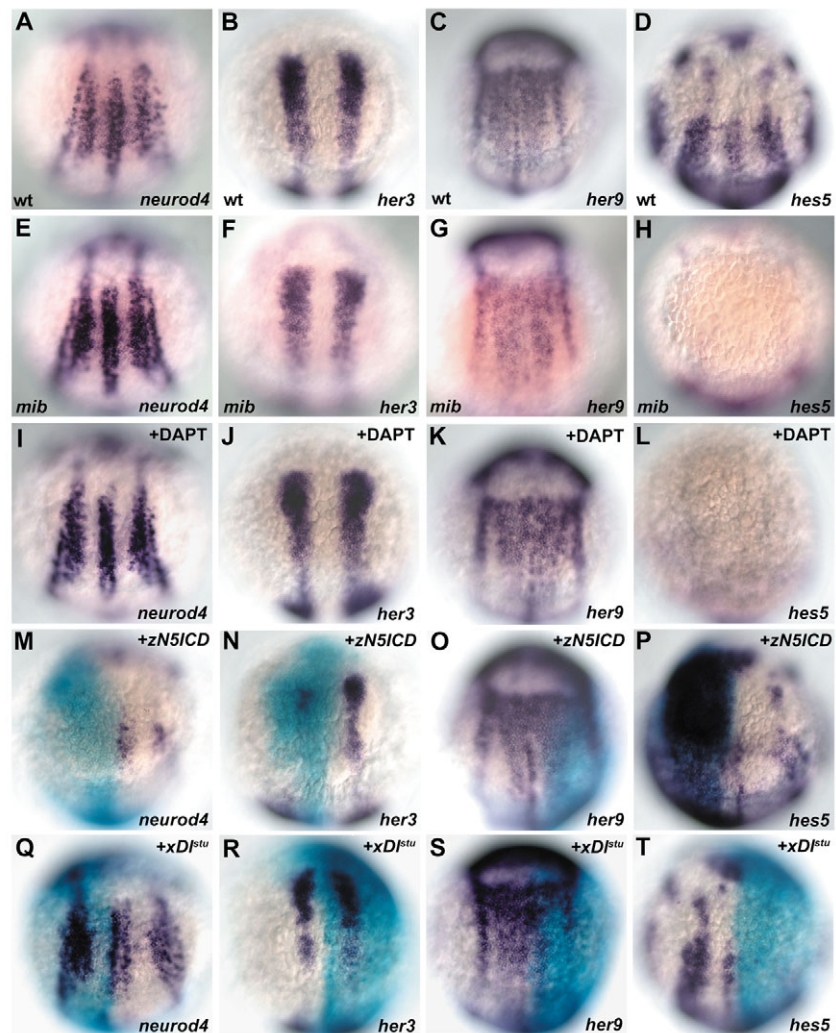

Source: https://cob.silverchair.com/dev/article-pdf/133/8/1609/1543617/1609.pdf
